# Supplementary material for: The 100 most-cited and 100 most-mentioned COVID-19-related radiological articles: a comparative bibliometric analysis
Source: Springer Nature journal article supplement (doi:10.1007/s00330-023-10001-x), 2023-08-15
Supplement: 330_2023_10001_MOESM1_ESM.pdf [file 330_2023_10001_MOESM1_ESM.pdf]

**Supplementary Table E1. The 100 most-cited COVID-19-related radiological articles ranked in order of the number of citations received**

| Ranking        | Article                                                                                                                                                                                                                                                                                                                                              | Number of citations | Altmetric Attention Score |
|----------------|------------------------------------------------------------------------------------------------------------------------------------------------------------------------------------------------------------------------------------------------------------------------------------------------------------------------------------------------------|---------------------|---------------------------|
| 1 <sup>†</sup> | Ai T, Yang Z, Hou H, Zhan C, Chen C, Lv W, Tao Q, Sun Z, Xia L. Correlation of Chest CT and RT-PCR Testing for Coronavirus Disease 2019 (COVID-19) in China: A Report of 1014 Cases. Radiology 2020;296(2):E32-E40. doi: 10.1148/radiol.2020200642                                                                                                   | 2762                | 2773                      |
| 2 <sup>†</sup> | Shi H, Han X, Jiang N, Cao Y, Alwalid O, Gu J, Fan Y, Zheng C. Radiological findings from 81 patients with COVID-19 pneumonia in Wuhan, China: a descriptive study. Lancet Infect Dis 2020;20(4):425-434. doi: 10.1016/S1473-3099(20)30086-4                                                                                                         | 1729                | 1064                      |
| 3 <sup>†</sup> | Fang Y, Zhang H, Xie J, Lin M, Ying L, Pang P, Ji W. Sensitivity of Chest CT for COVID-19: Comparison to RT-PCR. Radiology 2020;296(2):E115-E117. doi: 10.1148/radiol.2020200432                                                                                                                                                                     | 1487                | 1948                      |
| 4 <sup>†</sup> | Pan F, Ye T, Sun P, Gui S, Liang B, Li L, Zheng D, Wang J, Hesketh RL, Yang L, Zheng C. Time Course of Lung Changes at Chest CT during Recovery from Coronavirus Disease 2019 (COVID-19). Radiology 2020;295(3):715-721. doi: 10.1148/radiol.2020200370                                                                                              | 1127                | 294                       |
| 5 <sup>†</sup> | Xie X, Zhong Z, Zhao W, Zheng C, Wang F, Liu J. Chest CT for Typical Coronavirus Disease 2019 (COVID-19) Pneumonia: Relationship to Negative RT-PCR Testing. Radiology 2020;296(2):E41-E45. doi: 10.1148/radiol.2020200343                                                                                                                           | 1090                | 786                       |
| 6 <sup>†</sup> | Poyiadji N, Shahin G, Noujaim D, Stone M, Patel S, Griffith B. COVID-19-associated Acute Hemorrhagic Necrotizing Encephalopathy: Imaging Features. Radiology 2020;296(2):E119-E120. doi: 10.1148/radiol.2020201187                                                                                                                                   | 840                 | 2373                      |
| 7 <sup>†</sup> | Puntmann VO, Carerj ML, Wieters I, Fahim M, Arendt C, Hoffmann J, Shchendrygina A, Escher F, Vasa-Nicotera M, Zeiher AM, Vehreschild M, Nagel E. Outcomes of Cardiovascular Magnetic Resonance Imaging in Patients Recently Recovered From Coronavirus Disease 2019 (COVID-19). JAMA Cardiol 2020;5(11):1265-1273. doi: 10.1001/jamacardio.2020.3557 | 760                 | 13889                     |
| 8              | Salehi S, Abedi A, Balakrishnan S, Gholamrezanezhad A. Coronavirus Disease 2019 (COVID-19): A Systematic Review of Imaging Findings in 919 Patients. AJR Am J Roentgenol 2020;215(1):87-93. doi: 10.2214/AJR.20.23034                                                                                                                                | 721                 | 139                       |
| 9              | Ozturk T, Talo M, Yildirim EA, Baloglu UB, Yildirim O, Rajendra Acharya U. Automated detection of COVID-                                                                                                                                                                                                                                             | 639                 | 34                        |

|    |                                                                                                                                                                                                                                                                                                                                                        |     |     |
|----|--------------------------------------------------------------------------------------------------------------------------------------------------------------------------------------------------------------------------------------------------------------------------------------------------------------------------------------------------------|-----|-----|
|    | 19 cases using deep neural networks with X-ray images. Comput Biol Med 2020;121:103792. doi: 10.1016/j.combiomed.2020.103792                                                                                                                                                                                                                           |     |     |
| 10 | Apostolopoulos ID, Mpesiana TA. Covid-19: automatic detection from X-ray images utilizing transfer learning with convolutional neural networks. Phys Eng Sci Med 2020;43(2):635-640. doi: 10.1007/s13246-020-00865-4                                                                                                                                   | 600 | 7   |
| 11 | Zhao W, Zhong Z, Xie X, Yu Q, Liu J. Relation Between Chest CT Findings and Clinical Conditions of Coronavirus Disease (COVID-19) Pneumonia: A Multicenter Study. AJR Am J Roentgenol 2020;214(5):1072-1077. doi: 10.2214/AJR.20.22976                                                                                                                 | 595 | 211 |
| 12 | Bai HX, Hsieh B, Xiong Z, Halsey K, Choi JW, Tran TML, Pan I, Shi LB, Wang DC, Mei J, Jiang XL, Zeng QH, Egglin TK, Hu PF, Agarwal S, Xie FF, Li S, Healey T, Atalay MK, Liao WH. Performance of Radiologists in Differentiating COVID-19 from Non-COVID-19 Viral Pneumonia at Chest CT. Radiology 2020;296(2):E46-E54. doi: 10.1148/radiol.2020200823 | 593 | 191 |
| 13 | Ye Z, Zhang Y, Wang Y, Huang Z, Song B. Chest CT manifestations of new coronavirus disease 2019 (COVID-19): a pictorial review. Eur Radiol 2020;30(8):4381-4389. doi: 10.1007/s00330-020-06801-0                                                                                                                                                       | 591 | 69  |
| 14 | Li K, Wu J, Wu F, Guo D, Chen L, Fang Z, Li C. The Clinical and Chest CT Features Associated With Severe and Critical COVID-19 Pneumonia. Invest Radiol 2020;55(6):327-331. doi: 10.1097/RLI.0000000000000672                                                                                                                                          | 546 | 16  |

|                 |                                                                                                                                                                                                                                                                                                                                                                                                                                                                                                                                           |     |     |
|-----------------|-------------------------------------------------------------------------------------------------------------------------------------------------------------------------------------------------------------------------------------------------------------------------------------------------------------------------------------------------------------------------------------------------------------------------------------------------------------------------------------------------------------------------------------------|-----|-----|
| 15              | Rubin GD, Ryerson CJ, Haramati LB, Sverzellati N, Kanne JP, Raoof S, Schluger NW, Volpi A, Yim JJ, Martin IBK, Anderson DJ, Kong C, Altes T, Bush A, Desai SR, Goldin O, Goo JM, Humbert M, Inoue Y, Kauczor HU, Luo F, Mazzone PJ, Prokop M, Remy-Jardin M, Richeldi L, Schaefer-Prokop CM, Tomiyama N, Wells AU, Leung AN. The Role of Chest Imaging in Patient Management during the COVID-19 Pandemic: A Multinational Consensus Statement from the Fleischner Society. Radiology 2020;296(1):172-180. doi: 10.1148/radiol.2020201365 | 544 | 535 |
| 16 <sup>†</sup> | Xia W, Shao J, Guo Y, Peng X, Li Z, Hu D. Clinical and CT features in pediatric patients with COVID-19 infection: Different points from adults. Pediatr Pulmonol 2020;55(5):1169-1174. doi: 10.1002/ppul.24718                                                                                                                                                                                                                                                                                                                            | 537 | 295 |
| 17 <sup>†</sup> | Li Y, Xia L. Coronavirus Disease 2019 (COVID-19): Role of Chest CT in Diagnosis and Management. AJR Am J Roentgenol 2020;214(6):1280-1286. doi: 10.2214/AJR.20.22954                                                                                                                                                                                                                                                                                                                                                                      | 525 | 307 |
| 18              | Wong HYF, Lam HYS, Fong AH, Leung ST, Chin TW, Lo CSY, Lui MM, Lee JCY, Chiu KW, Chung TW, Lee EYP, Wan EYF, Hung IFN, Lam TPW, Kuo MD, Ng MY. Frequency and Distribution of Chest Radiographic Findings in Patients Positive for COVID-19. Radiology 2020;296(2):E72-E78. doi: 10.1148/radiol.2020201160                                                                                                                                                                                                                                 | 520 | 165 |
| 19              | Zhou S, Wang Y, Zhu T, Xia L. CT Features of Coronavirus Disease 2019 (COVID-19) Pneumonia in 62 Patients in Wuhan, China. AJR Am J Roentgenol 2020;214(6):1287-1294. doi: 10.2214/AJR.20.22975                                                                                                                                                                                                                                                                                                                                           | 515 | 127 |
| 20 <sup>†</sup> | Li L, Qin L, Xu Z, Yin Y, Wang X, Kong B, Bai J, Lu Y, Fang Z, Song Q, Cao K, Liu D, Wang G, Xu Q, Fang X, Zhang S, Xia J, Xia J. Using Artificial Intelligence to Detect COVID-19 and Community-acquired Pneumonia Based on Pulmonary CT: Evaluation of the Diagnostic Accuracy. Radiology 2020;296(2):E65-                                                                                                                                                                                                                              | 483 | 255 |

|    |                                                                                                                                                                                                                                                                                                             |     |    |
|----|-------------------------------------------------------------------------------------------------------------------------------------------------------------------------------------------------------------------------------------------------------------------------------------------------------------|-----|----|
|    | E71. doi: 10.1148/radiol.2020200905                                                                                                                                                                                                                                                                         |     |    |
| 21 | Yang W, Cao Q, Qin L, Wang X, Cheng Z, Pan A, Dai J, Sun Q, Zhao F, Qu J, Yan F. Clinical characteristics and imaging manifestations of the 2019 novel coronavirus disease (COVID-19):A multi-center study in Wenzhou city, Zhejiang, China. J Infect 2020;80(4):388-393. doi: 10.1016/j.jinf.2020.02.016   | 473 | 39 |
| 22 | Xu X, Yu C, Qu J, Zhang L, Jiang S, Huang D, Chen B, Zhang Z, Guan W, Ling Z, Jiang R, Hu T, Ding Y, Lin L, Gan Q, Luo L, Tang X, Liu J. Imaging and clinical features of patients with 2019 novel coronavirus SARS-CoV-2. Eur J Nucl Med Mol Imaging 2020;47(5):1275-1280. doi: 10.1007/s00259-020-04735-9 | 440 | 15 |
| 23 | Wang S, Kang B, Ma J, Zeng X, Xiao M, Guo J, Cai M, Yang J, Li Y, Meng X, Xu B. A deep learning algorithm using CT images to screen for Corona virus disease (COVID-19). Eur Radiol 2021;31(8):6096-6104. doi: 10.1007/s00330-021-07715-1                                                                   | 430 | 1  |
| 24 | Long C, Xu H, Shen Q, Zhang X, Fan B, Wang C, Zeng B, Li Z, Li X, Li H. Diagnosis of the Coronavirus disease (COVID-19): rRT-PCR or CT? Eur J Radiol 2020;126:108961. doi: 10.1016/j.ejrad.2020.108961                                                                                                      | 421 | 87 |
| 25 | Shi F, Wang J, Shi J, Wu Z, Wang Q, Tang Z, He K, Shi Y, Shen D. Review of Artificial Intelligence Techniques in Imaging Data Acquisition, Segmentation, and Diagnosis for COVID-19. IEEE Rev Biomed Eng 2021;14:4-15. doi: 10.1109/RBME.2020.2987975                                                       | 385 | 5  |
| 26 | Pan Y, Guan H, Zhou S, Wang Y, Li Q, Zhu T, Hu Q, Xia L. Initial CT findings and temporal changes in patients with the novel coronavirus pneumonia (2019-nCoV): a study of 63 patients in Wuhan, China. Eur Radiol 2020;30(6):3306-3309. doi: 10.1007/s00330-020-06731-x                                    | 348 | 90 |

|     |                                                                                                                                                                                                                                                                                                                                                                             |     |     |
|-----|-----------------------------------------------------------------------------------------------------------------------------------------------------------------------------------------------------------------------------------------------------------------------------------------------------------------------------------------------------------------------------|-----|-----|
| 27  | Yoon SH, Lee KH, Kim JY, Lee YK, Ko H, Kim KH, Park CM, Kim YH. Chest Radiographic and CT Findings of the 2019 Novel Coronavirus Disease (COVID-19): Analysis of Nine Patients Treated in Korea. Korean J Radiol 2020;21(4):494-500. doi: 10.3348/kjr.2020.0132                                                                                                             | 314 | 9   |
| 28  | Li K, Fang Y, Li W, Pan C, Qin P, Zhong Y, Liu X, Huang M, Liao Y, Li S. CT image visual quantitative evaluation and clinical classification of coronavirus disease (COVID-19). Eur Radiol 2020;30(8):4407-4416. doi: 10.1007/s00330-020-06817-6                                                                                                                            | 312 | 8   |
| 29  | Caruso D, Zerunian M, Polici M, Pucciarelli F, Polidori T, Rucci C, Guido G, Bracci B, De Dominicis C, Laghi A. Chest CT Features of COVID-19 in Rome, Italy. Radiology 2020;296(2):E79-E85. doi: 10.1148/radiol.2020201237                                                                                                                                                 | 307 | 152 |
| 30  | Prokop M, van Everdingen W, van Rees Vellinga T, Quarles van Ufford H, Stoger L, Beenen L, Geurts B, Gietema H, Krdzalic J, Schaefer-Prokop C, van Ginneken B, Brink M, Society C-SRWGotDR. CO-RADS: A Categorical CT Assessment Scheme for Patients Suspected of Having COVID-19-Definition and Evaluation. Radiology 2020;296(2):E97-E104. doi: 10.1148/radiol.2020201473 | 299 | 147 |
| 31* | Wu J, Wu X, Zeng W, Guo D, Fang Z, Chen L, Huang H, Li C. Chest CT Findings in Patients With Coronavirus Disease 2019 and Its Relationship With Clinical Features. Invest Radiol 2020;55(5):257-261. doi: 10.1097/RLI.0000000000000670                                                                                                                                      | 295 | 33  |
| 31† | Lei J, Li J, Li X, Qi X. CT Imaging of the 2019 Novel Coronavirus (2019-nCoV) Pneumonia. Radiology 2020;295(1):18. doi: 10.1148/radiol.2020200236                                                                                                                                                                                                                           | 295 | 520 |
| 33* | Kanne JP. Chest CT Findings in 2019 Novel Coronavirus (2019-nCoV) Infections from Wuhan, China: Key Points for the Radiologist. Radiology 2020;295(1):16-17. doi: 10.1148/radiol.2020200241                                                                                                                                                                                 | 290 | 124 |
| 33† | Xu YH, Dong JH, An WM, Lv XY, Yin XP, Zhang JZ, Dong L, Ma X, Zhang HJ, Gao BL. Clinical and computed tomographic imaging features of novel coronavirus pneumonia caused by SARS-CoV-2. J Infect 2020;80(4):394-400. doi: 10.1016/j.jinf.2020.02.017                                                                                                                        | 290 | 352 |
| 35  | Narin A, Kaya C, Pamuk Z. Automatic detection of coronavirus disease (COVID-19) using X-ray images and deep convolutional neural networks. Pattern Anal Appl 2021;24(3):1207-1220. doi: 10.1007/s10044-021-00984-y                                                                                                                                                          | 271 | 1   |
| 36  | Khan AI, Shah JL, Bhat MM. CoroNet: A deep neural network for detection and diagnosis of COVID-19 from chest x-ray images. Comput Methods Programs Biomed 2020;196:105581. doi: 10.1016/j.cmpb.2020.105581                                                                                                                                                                  | 268 | 2   |
| 37† | Leonard-Lorant I, Delabranche X, Severac F, Helms J, Pauzet C, Collange O, Schneider F, Labani A, Bilbault                                                                                                                                                                                                                                                                  | 266 | 460 |

|                 |                                                                                                                                                                                                                                                                                                                                                                                                                                                                                                                                                                  |     |     |
|-----------------|------------------------------------------------------------------------------------------------------------------------------------------------------------------------------------------------------------------------------------------------------------------------------------------------------------------------------------------------------------------------------------------------------------------------------------------------------------------------------------------------------------------------------------------------------------------|-----|-----|
|                 | P, Moliere S, Leyendecker P, Roy C, Ohana M. Acute Pulmonary Embolism in Patients with COVID-19 at CT Angiography and Relationship to d-Dimer Levels. Radiology 2020;296(3):E189-E191. doi: 10.1148/radiol.2020201561                                                                                                                                                                                                                                                                                                                                            |     |     |
| 38 <sup>†</sup> | Soldati G, Smargiassi A, Inchingolo R, Buonsenso D, Perrone T, Briganti DF, Perlini S, Torri E, Mariani A, Mossolani EE, Tursi F, Mento F, Demi L. Proposal for International Standardization of the Use of Lung Ultrasound for Patients With COVID-19: A Simple, Quantitative, Reproducible Method. J Ultrasound Med 2020;39(7):1413-1419. doi: 10.1002/jum.15285                                                                                                                                                                                               | 253 | 306 |
| 39              | Zhang K, Liu X, Shen J, Li Z, Sang Y, Wu X, Zha Y, Liang W, Wang C, Wang K, Ye L, Gao M, Zhou Z, Li L, Wang J, Yang Z, Cai H, Xu J, Yang L, Cai W, Xu W, Wu S, Zhang W, Jiang S, Zheng L, Zhang X, Wang L, Lu L, Li J, Yin H, Wang W, Li O, Zhang C, Liang L, Wu T, Deng R, Wei K, Zhou Y, Chen T, Lau JY, Fok M, He J, Lin T, Li W, Wang G. Clinically Applicable AI System for Accurate Diagnosis, Quantitative Measurements, and Prognosis of COVID-19 Pneumonia Using Computed Tomography. Cell 2020;181(6):1423-1433 e1411. doi: 10.1016/j.cell.2020.04.045 | 247 | 202 |
| 40 <sup>†</sup> | Grillet F, Behr J, Calame P, Aubry S, Delabrousse E. Acute Pulmonary Embolism Associated with COVID-19 Pneumonia Detected with Pulmonary CT Angiography. Radiology 2020;296(3):E186-E188. doi: 10.1148/radiol.2020201544                                                                                                                                                                                                                                                                                                                                         | 241 | 454 |
| 41              | Yang W, Yan F. Patients with RT-PCR-confirmed COVID-19 and Normal Chest CT. Radiology 2020;295(2):E3. doi: 10.1148/radiol.2020200702                                                                                                                                                                                                                                                                                                                                                                                                                             | 237 | 42  |
| 42              | Colombi D, Bodini FC, Petrini M, Maffi G, Morelli N, Milanese G, Silva M, Sverzellati N, Michieletti E. Well-aerated Lung on Admitting Chest CT to Predict Adverse Outcome in COVID-19 Pneumonia. Radiology 2020;296(2):E86-E96. doi: 10.1148/radiol.2020201433                                                                                                                                                                                                                                                                                                  | 234 | 49  |
| 43 <sup>†</sup> | Chung M, Bernheim A, Mei X, Zhang N, Huang M, Zeng X, Cui J, Xu W, Yang Y, Fayad ZA, Jacobi A, Li K, Li S, Shan H. CT Imaging Features of 2019 Novel Coronavirus (2019-nCoV). Radiology 2020;295(1):202-207. doi: 10.1148/radiol.2020200230                                                                                                                                                                                                                                                                                                                      | 233 | 364 |
| 44              | Huang P, Liu T, Huang L, Liu H, Lei M, Xu W, Hu X, Chen J, Liu B. Use of Chest CT in Combination with Negative RT-PCR Assay for the 2019 Novel Coronavirus but High Clinical Suspicion. Radiology 2020;295(1):22-23. doi: 10.1148/radiol.2020200330                                                                                                                                                                                                                                                                                                              | 230 | 54  |
| 45 <sup>†</sup> | Xiong Y, Sun D, Liu Y, Fan Y, Zhao L, Li X, Zhu W. Clinical and High-Resolution CT Features of the COVID-19 Infection: Comparison of the Initial and Follow-up Changes. Invest Radiol 2020;55(6):332-339. doi: 10.1097/RLI.0000000000000674                                                                                                                                                                                                                                                                                                                      | 229 | 9   |
| 45 <sup>†</sup> | Kooraki S, Hosseiny M, Myers L, Gholamrezanezhad A. Coronavirus (COVID-19) Outbreak: What the                                                                                                                                                                                                                                                                                                                                                                                                                                                                    | 229 | 158 |

|      |                                                                                                                                                                                                                                                                                                                                                                                    |     |      |
|------|------------------------------------------------------------------------------------------------------------------------------------------------------------------------------------------------------------------------------------------------------------------------------------------------------------------------------------------------------------------------------------|-----|------|
|      | Department of Radiology Should Know. J Am Coll Radiol 2020;17(4):447-451. doi: 10.1016/j.jacr.2020.02.008                                                                                                                                                                                                                                                                          |     |      |
| 47   | Francone M, Iafrate F, Masci GM, Coco S, Cilia F, Manganaro L, Panebianco V, Andreoli C, Colaiacomo MC, Zingaropoli MA, Ciardi MR, Mastroianni CM, Pugliese F, Alessandri F, Turriziani O, Ricci P, Catalano C. Chest CT score in COVID-19 patients: correlation with disease severity and short-term prognosis. Eur Radiol 2020;30(12):6808-6817. doi: 10.1007/s00330-020-07033-y | 228 | 13   |
| 48   | Soldati G, Smargiassi A, Inchingolo R, Buonsenso D, Perrone T, Briganti DF, Perlini S, Torri E, Mariani A, Mossolani EE, Tursi F, Mento F, Demi L. Is There a Role for Lung Ultrasound During the COVID-19 Pandemic? J Ultrasound Med 2020;39(7):1459-1462. doi: 10.1002/jum.15284                                                                                                 | 225 | 66   |
| 49   | Soldati G, Smargiassi A, Inchingolo R, Buonsenso D, Perrone T, Briganti DF, Perlini S, Torri E, Mariani A, Mossolani EE, Tursi F, Mento F, Demi L. Is There a Role for Lung Ultrasound During the COVID-19 Pandemic? J Ultrasound Med 2020;39(7):1459-1462. doi: 10.1002/jum.15284                                                                                                 | 222 | 4    |
| 50*  | Jacobi A, Chung M, Bernheim A, Eber C. Portable chest X-ray in coronavirus disease-19 (COVID-19): A pictorial review. Clin Imaging 2020;64:35-42. doi: 10.1016/j.clinimag.2020.04.001                                                                                                                                                                                              | 219 | 38   |
| 50** | Hosseiny M, Kooraki S, Gholamrezaezhad A, Reddy S, Myers L. Radiology Perspective of Coronavirus Disease 2019 (COVID-19): Lessons From Severe Acute Respiratory Syndrome and Middle East Respiratory Syndrome. AJR Am J Roentgenol 2020;214(5):1078-1082. doi: 10.2214/AJR.20.22969                                                                                                | 219 | 754  |
| 52   | Fan DP, Zhou T, Ji GP, Zhou Y, Chen G, Fu H, Shen J, Shao L. Inf-Net: Automatic COVID-19 Lung Infection Segmentation From CT Images. IEEE Trans Med Imaging 2020;39(8):2626-2637. doi: 10.1109/TMI.2020.2996645                                                                                                                                                                    | 208 | 6    |
| 53†  | Huang L, Zhao P, Tang D, Zhu T, Han R, Zhan C, Liu W, Zeng H, Tao Q, Xia L. Cardiac Involvement in Patients Recovered From COVID-2019 Identified Using Magnetic Resonance Imaging. JACC Cardiovasc Imaging 2020;13(11):2330-2339. doi: 10.1016/j.jcmg.2020.05.004                                                                                                                  | 207 | 733  |
| 54   | Oh Y, Park S, Ye JC. Deep Learning COVID-19 Features on CXR Using Limited Training Data Sets. IEEE Trans Med Imaging 2020;39(8):2688-2700. doi: 10.1109/TMI.2020.2993291                                                                                                                                                                                                           | 202 | 3    |
| 55†  | Rajpal S, Tong MS, Borchers J, Zareba KM, Obarski TP, Simonetti OP, Daniels CJ. Cardiovascular Magnetic Resonance Findings in Competitive Athletes Recovering From COVID-19 Infection. JAMA Cardiol 2021;6(1):116-118. doi: 10.1001/jamacardio.2020.4916                                                                                                                           | 200 | 3908 |
| 56   | Pan Y, Guan H. Imaging changes in patients with 2019-nCov. Eur Radiol 2020;30(7):3612-3613. doi: 10.1007/s00330-020-06713-z                                                                                                                                                                                                                                                        | 199 | 22   |

|                 |                                                                                                                                                                                                                                                                                                                                                                                                                                                                                                                                                                                                                                                                                                                                                                                                                                           |     |      |
|-----------------|-------------------------------------------------------------------------------------------------------------------------------------------------------------------------------------------------------------------------------------------------------------------------------------------------------------------------------------------------------------------------------------------------------------------------------------------------------------------------------------------------------------------------------------------------------------------------------------------------------------------------------------------------------------------------------------------------------------------------------------------------------------------------------------------------------------------------------------------|-----|------|
| 57              | Li D, Wang D, Dong J, Wang N, Huang H, Xu H, Xia C. False-Negative Results of Real-Time Reverse-Transcriptase Polymerase Chain Reaction for Severe Acute Respiratory Syndrome Coronavirus 2: Role of Deep-Learning-Based CT Diagnosis and Insights from Two Cases. <i>Korean J Radiol</i> 2020;21(4):505-508. doi: 10.3348/kjr.2020.0146                                                                                                                                                                                                                                                                                                                                                                                                                                                                                                  | 198 | 8    |
| 58 <sup>†</sup> | Bernheim A, Mei X, Huang M, Yang Y, Fayad ZA, Zhang N, Diao K, Lin B, Zhu X, Li K, Li S, Shan H, Jacobi A, Chung M. Chest CT Findings in Coronavirus Disease-19 (COVID-19): Relationship to Duration of Infection. <i>Radiology</i> 2020;295(3):200463. doi: 10.1148/radiol.2020200463                                                                                                                                                                                                                                                                                                                                                                                                                                                                                                                                                    | 195 | 977  |
| 58*             | Singh D, Kumar V, Vaishali, Kaur M. Classification of COVID-19 patients from chest CT images using multi-objective differential evolution-based convolutional neural networks. <i>Eur J Clin Microbiol Infect Dis</i> 2020;39(7):1379-1389. doi: 10.1007/s10096-020-03901-z                                                                                                                                                                                                                                                                                                                                                                                                                                                                                                                                                               | 195 | -    |
| 60              | Ucar F, Korkmaz D. COVIDiagnosis-Net: Deep Bayes-SqueezeNet based diagnosis of the coronavirus disease 2019 (COVID-19) from X-ray images. <i>Med Hypotheses</i> 2020;140:109761. doi: 10.1016/j.mehy.2020.109761                                                                                                                                                                                                                                                                                                                                                                                                                                                                                                                                                                                                                          | 194 | 10   |
| 61              | Minaee S, Kafieh R, Sonka M, Yazdani S, Jamalipour Soufi G. Deep-COVID: Predicting COVID-19 from chest X-ray images using deep transfer learning. <i>Med Image Anal</i> 2020;65:101794. doi: 10.1016/j.media.2020.101794                                                                                                                                                                                                                                                                                                                                                                                                                                                                                                                                                                                                                  | 191 | 2    |
| 62              | Liu H, Liu F, Li J, Zhang T, Wang D, Lan W. Clinical and CT imaging features of the COVID-19 pneumonia: Focus on pregnant women and children. <i>J Infect</i> 2020;80(5):e7-e13. doi: 10.1016/j.jinf.2020.03.007                                                                                                                                                                                                                                                                                                                                                                                                                                                                                                                                                                                                                          | 189 | 37   |
| 63              | Yuan M, Yin W, Tao Z, Tan W, Hu Y. Association of radiologic findings with mortality of patients infected with 2019 novel coronavirus in Wuhan, China. <i>PLoS One</i> 2020;15(3):e0230548. doi: 10.1371/journal.pone.0230548                                                                                                                                                                                                                                                                                                                                                                                                                                                                                                                                                                                                             | 187 | 77   |
| 64 <sup>†</sup> | Politi LS, Salsano E, Grimaldi M. Magnetic Resonance Imaging Alteration of the Brain in a Patient With Coronavirus Disease 2019 (COVID-19) and Anosmia. <i>JAMA Neurol</i> 2020;77(8):1028-1029. doi: 10.1001/jamaneurol.2020.2125                                                                                                                                                                                                                                                                                                                                                                                                                                                                                                                                                                                                        | 186 | 1409 |
| 65 <sup>†</sup> | Kremer S, Lersy F, de Seze J, Ferre JC, Maamar A, Carsin-Nicol B, Collange O, Bonneville F, Adam G, Martin-Blondel G, Rafiq M, Geeraerts T, Delamarre L, Grand S, Krainik A, Caillard S, Constans JM, Metanbou S, Heintz A, Helms J, Schenck M, Lefebvre N, Boutet C, Fabre X, Forestier G, de Beaurepaire I, Bornet G, Lacalm A, Oesterle H, Bolognini F, Messie J, Hmeydia G, Benzakoun J, Oppenheim C, Bapst B, Megdiche I, Henry Feugeas MC, Khalil A, Gaudemer A, Jager L, Nesser P, Talla Mba Y, Hemmert C, Feuerstein P, Sebag N, Carre S, Alleg M, Lecocq C, Schmitt E, Anxionnat R, Zhu F, Comby PO, Ricolfi F, Thouant P, Desal H, Boulouis G, Berge J, Kazemi A, Pyatigorskaya N, Lecler A, Saleme S, Edjlali-Goujon M, Kerleroux B, Zorn PE, Matthieu M, Baloglu S, Ardellier FD, Willaume T, Brisset JC, Boulay C, Mutschler | 183 | 595  |



|                  |                                                                                                                                                                                                                                                                                                                                                                  |     |     |
|------------------|------------------------------------------------------------------------------------------------------------------------------------------------------------------------------------------------------------------------------------------------------------------------------------------------------------------------------------------------------------------|-----|-----|
|                  | V, Hansmann Y, Mertes PM, Schneider F, Fafi-Kremer S, Ohana M, Meziani F, David JS, Meyer N, Anheim M, Cotton F. Brain MRI Findings in Severe COVID-19: A Retrospective Observational Study. Radiology 2020;297(2):E242-E251. doi: 10.1148/radiol.2020202222                                                                                                     |     |     |
| 66               | Wang L, Lin ZQ, Wong A. COVID-Net: a tailored deep convolutional neural network design for detection of COVID-19 cases from chest X-ray images. Sci Rep 2020;10(1):19549. doi: 10.1038/s41598-020-76550-z                                                                                                                                                        | 178 | 23  |
| 67*              | Bao C, Liu X, Zhang H, Li Y, Liu J. Coronavirus Disease 2019 (COVID-19) CT Findings: A Systematic Review and Meta-analysis. J Am Coll Radiol 2020;17(6):701-709. doi: 10.1016/j.jacr.2020.03.006                                                                                                                                                                 | 175 | 21  |
| 67*              | Hani C, Trieu NH, Saab I, Dangeard S, Bennani S, Chassagnon G, Revel MP. COVID-19 pneumonia: A review of typical CT findings and differential diagnosis. Diagn Interv Imaging 2020;101(5):263-268. doi: 10.1016/j.diii.2020.03.014                                                                                                                               | 175 | 16  |
| 67*              | Qin C, Liu F, Yen TC, Lan X. (18)F-FDG PET/CT findings of COVID-19: a series of four highly suspected cases. Eur J Nucl Med Mol Imaging 2020;47(5):1281-1286. doi: 10.1007/s00259-020-04734-w                                                                                                                                                                    | 175 | 30  |
| 70               | Togacar M, Ergen B, Comert Z. COVID-19 detection using deep learning models to exploit Social Mimic Optimization and structured chest X-ray images using fuzzy color and stacking approaches. Comput Biol Med 2020;121:103805. doi: 10.1016/j.compbiomed.2020.103805                                                                                             | 167 | 7   |
| 71 <sup>††</sup> | Oudkerk M, Buller HR, Kuijpers D, van Es N, Oudkerk SF, McLoud T, Gommers D, van Dissel J, Ten Cate H, van Beek EJR. Diagnosis, Prevention, and Treatment of Thromboembolic Complications in COVID-19: Report of the National Institute for Public Health of the Netherlands. Radiology 2020;297(1):E216-E222. doi: 10.1148/radiol.2020201629                    | 165 | 680 |
| 71 <sup>††</sup> | Poggiali E, Dacrema A, Bastoni D, Tinelli V, Demichele E, Mateo Ramos P, Marciano T, Silva M, Vercelli A, Magnacavallo A. Can Lung US Help Critical Care Clinicians in the Early Diagnosis of Novel Coronavirus (COVID-19) Pneumonia? Radiology 2020;295(3):E6. doi: 10.1148/radiol.2020200847                                                                   | 165 | 389 |
| 73               | Revel MP, Parkar AP, Prosch H, Silva M, Sverzellati N, Gleeson F, Brady A, European Society of R, the European Society of Thoracic I. COVID-19 patients and the radiology department - advice from the European Society of Radiology (ESR) and the European Society of Thoracic Imaging (ESTI). Eur Radiol 2020;30(9):4903-4909. doi: 10.1007/s00330-020-06865-y | 163 | 53  |
| 74               | Wang S, Zha Y, Li W, Wu Q, Li X, Niu M, Wang M, Qiu X, Li H, Yu H, Gong W, Bai Y, Li L, Zhu Y, Wang L, Tian J. A fully automatic deep learning system for COVID-19 diagnostic and prognostic analysis. Eur Respir J 2020;56(2). doi: 10.1183/13993003.00775-2020                                                                                                 | 162 | 21  |
| 75*              | Song Y, Zheng S, Li L, Zhang X, Zhang X, Huang Z, Chen J, Wang R, Zhao H, Chong Y, Shen J, Zha Y,                                                                                                                                                                                                                                                                | 160 | 1   |

|     |                                                                                                                                                                                                                                                                                                                          |     |     |
|-----|--------------------------------------------------------------------------------------------------------------------------------------------------------------------------------------------------------------------------------------------------------------------------------------------------------------------------|-----|-----|
|     | Yang Y. Deep Learning Enables Accurate Diagnosis of Novel Coronavirus (COVID-19) With CT Images. IEEE/ACM Trans Comput Biol Bioinform 2021;18(6):2775-2780. doi: 10.1109/TCBB.2021.3065361                                                                                                                               |     |     |
| 75* | Afshar P, Heidarian S, Naderkhani F, Oikonomou A, Plataniotis KN, Mohammadi A. COVID-CAPS: A capsule network-based framework for identification of COVID-19 cases from X-ray images. Pattern Recognit Lett 2020;138:638-643. doi: 10.1016/j.patrec.2020.09.010                                                           | 160 | 1   |
| 75* | Han R, Huang L, Jiang H, Dong J, Peng H, Zhang D. Early Clinical and CT Manifestations of Coronavirus Disease 2019 (COVID-19) Pneumonia. AJR Am J Roentgenol 2020;215(2):338-343. doi: 10.2214/AJR.20.22961                                                                                                              | 160 | 19  |
| 75* | Wang X, Deng X, Fu Q, Zhou Q, Feng J, Ma H, Liu W, Zheng C. A Weakly-Supervised Framework for COVID-19 Classification and Lesion Localization From Chest CT. IEEE Trans Med Imaging 2020;39(8):2615-2625. doi: 10.1109/TMI.2020.2995965                                                                                  | 160 | 4   |
| 79* | Borghesi A, Maroldi R. COVID-19 outbreak in Italy: experimental chest X-ray scoring system for quantifying and monitoring disease progression. Radiol Med 2020;125(5):509-513. doi: 10.1007/s11547-020-01200-3                                                                                                           | 155 | 3   |
| 79† | Smith MJ, Hayward SA, Innes SM, Miller ASC. Point-of-care lung ultrasound in patients with COVID-19 - a narrative review. Anaesthesia 2020;75(8):1096-1104. doi: 10.1111/anae.15082                                                                                                                                      | 155 | 701 |
| 79† | Lee EYP, Ng MY, Khong PL. COVID-19 pneumonia: what has CT taught us? Lancet Infect Dis 2020;20(4):384-385. doi: 10.1016/S1473-3099(20)30134-1                                                                                                                                                                            | 155 | 339 |
| 82† | Lang M, Som A, Mendoza DP, Flores EJ, Reid N, Carey D, Li MD, Witkin A, Rodriguez-Lopez JM, Shepard JO, Little BP. Hypoxaemia related to COVID-19: vascular and perfusion abnormalities on dual-energy CT. Lancet Infect Dis 2020;20(12):1365-1366. doi: 10.1016/S1473-3099(20)30367-4                                   | 151 | 234 |
| 82* | Panwar H, Gupta PK, Siddiqui MK, Morales-Menendez R, Singh V. Application of deep learning for fast detection of COVID-19 in X-Rays using nCOVnet. Chaos Solitons Fractals 2020;138:109944. doi: 10.1016/j.chaos.2020.109944                                                                                             | 151 | 0   |
| 82* | Sun R, Liu H, Wang X. Mediastinal Emphysema, Giant Bulla, and Pneumothorax Developed during the Course of COVID-19 Pneumonia. Korean J Radiol 2020;21(5):541-544. doi: 10.3348/kjr.2020.0180                                                                                                                             | 151 | 11  |
| 85  | Buonsenso D, Piano A, Raffaelli F, Bonadia N, de Gaetano Donati K, Franceschi F. Point-of-Care Lung Ultrasound findings in novel coronavirus disease-19 pneumoniae: a case report and potential applications during COVID-19 outbreak. Eur Rev Med Pharmacol Sci 2020;24(5):2776-2780. doi: 10.26355/eurrev_202003_20549 | 149 | 2   |
| 86  | Yang W, Sirajuddin A, Zhang X, Liu G, Teng Z, Zhao S, Lu M. The role of imaging in 2019 novel coronavirus                                                                                                                                                                                                                | 148 | 24  |

|     |                                                                                                                                                                                                                                                                                                                                                                                                                                                                                                                                                                                            |     |     |
|-----|--------------------------------------------------------------------------------------------------------------------------------------------------------------------------------------------------------------------------------------------------------------------------------------------------------------------------------------------------------------------------------------------------------------------------------------------------------------------------------------------------------------------------------------------------------------------------------------------|-----|-----|
|     | pneumonia (COVID-19). Eur Radiol 2020;30(9):4874-4882. doi: 10.1007/s00330-020-06827-4                                                                                                                                                                                                                                                                                                                                                                                                                                                                                                     |     |     |
| 87  | Rubin GD, Ryerson CJ, Haramati LB, Sverzellati N, Kanne JP, Raoof S, Schluger NW, Volpi A, Yim JJ, Martin IBK, Anderson DJ, Kong C, Altes T, Bush A, Desai SR, Goldin J, Goo JM, Humbert M, Inoue Y, Kauczor HU, Luo F, Mazzone PJ, Prokop M, Remy-Jardin M, Richeldi L, Schaefer-Prokop CM, Tomiyama N, Wells AU, Leung AN. The Role of Chest Imaging in Patient Management During the COVID-19 Pandemic: A Multinational Consensus Statement From the Fleischner Society. Chest 2020;158(1):106-116. doi: 10.1016/j.chest.2020.04.003                                                    | 147 | 66  |
| 88  | Cheng Z, Lu Y, Cao Q, Qin L, Pan Z, Yan F, Yang W. Clinical Features and Chest CT Manifestations of Coronavirus Disease 2019 (COVID-19) in a Single-Center Study in Shanghai, China. AJR Am J Roentgenol 2020;215(1):121-126. doi: 10.2214/AJR.20.22959                                                                                                                                                                                                                                                                                                                                    | 145 | 19  |
| 89  | Toussie D, Voutsinas N, Finkelstein M, Cedillo MA, Manna S, Maron SZ, Jacobi A, Chung M, Bernheim A, Eber C, Concepcion J, Fayad ZA, Gupta YS. Clinical and Chest Radiography Features Determine Patient Outcomes in Young and Middle-aged Adults with COVID-19. Radiology 2020;297(1):E197-E206. doi: 10.1148/radiol.2020201754                                                                                                                                                                                                                                                           | 144 | 164 |
| 90† | Mossa-Basha M, Meltzer CC, Kim DC, Tuite MJ, Kolli KP, Tan BS. Radiology Department Preparedness for COVID-19: Radiology Scientific Expert Review Panel. Radiology 2020;296(2):E106-E112. doi: 10.1148/radiol.2020200988                                                                                                                                                                                                                                                                                                                                                                   | 143 | 293 |
| 91* | Altan A, Karasu S. Recognition of COVID-19 disease from X-ray images by hybrid model consisting of 2D curvelet transform, chaotic salp swarm algorithm and deep learning technique. Chaos Solitons Fractals 2020;140:110071. doi: 10.1016/j.chaos.2020.110071                                                                                                                                                                                                                                                                                                                              | 139 | N/A |
| 91* | Harmon SA, Sanford TH, Xu S, Turkbey EB, Roth H, Xu Z, Yang D, Myronenko A, Anderson V, Amalou A, Blain M, Kassin M, Long D, Varble N, Walker SM, Bagci U, Ierardi AM, Stellato E, Plensich GG, Franceschelli G, Girlando C, Irmici G, Labella D, Hammoud D, Malayeri A, Jones E, Summers RM, Choyke PL, Xu D, Flores M, Tamura K, Obinata H, Mori H, Patella F, Cariati M, Carrafiello G, An P, Wood BJ, Turkbey B. Artificial intelligence for the detection of COVID-19 pneumonia on chest CT using multinational datasets. Nat Commun 2020;11(1):4080. doi: 10.1038/s41467-020-17971-2 | 139 | 203 |
| 91* | Loey M, Smarandache F, M. Khalifa NE. Within the Lack of Chest COVID-19 X-ray Dataset: A Novel Detection Model Based on GAN and Deep Transfer Learning. Symmetry 2020;12(4). doi: 10.3390/sym12040651                                                                                                                                                                                                                                                                                                                                                                                      | 139 | 4   |
| 94* | Dai WC, Zhang HW, Yu J, Xu HJ, Chen H, Luo SP, Zhang H, Liang LH, Wu XL, Lei Y, Lin F. CT Imaging and Differential Diagnosis of COVID-19. Can Assoc Radiol J 2020;71(2):195-200. doi: 10.1177/0846537120913033                                                                                                                                                                                                                                                                                                                                                                             | 138 | 25  |

|     |                                                                                                                                                                                                                                                                                                                                                                                                                                                                                                                                                                                                                                                                                               |     |     |
|-----|-----------------------------------------------------------------------------------------------------------------------------------------------------------------------------------------------------------------------------------------------------------------------------------------------------------------------------------------------------------------------------------------------------------------------------------------------------------------------------------------------------------------------------------------------------------------------------------------------------------------------------------------------------------------------------------------------|-----|-----|
| 94* | Li W, Cui H, Li K, Fang Y, Li S. Chest computed tomography in children with COVID-19 respiratory infection. <i>Pediatr Radiol</i> 2020;50(6):796-799. doi: 10.1007/s00247-020-04656-7                                                                                                                                                                                                                                                                                                                                                                                                                                                                                                         | 138 | 25  |
| 96  | Kandemirli SG, Dogan L, Sarikaya ZT, Kara S, Akinci C, Kaya D, Kaya Y, Yildirim D, Tuzuner F, Yildirim MS, Ozluk E, Gucyetmez B, Karaarslan E, Koyluoglu I, Demirel Kaya HS, Mammadov O, Kisa Ozdemir I, Afsar N, Citci Yalcinkaya B, Rasimoglu S, Guduk DE, Kedir Jima A, Ilksoz A, Ersoz V, Yonca Eren M, Celtik N, Arslan S, Korkmazer B, Dincer SS, Gulek E, Dikmen I, Yazici M, Unsal S, Ljama T, Demirel I, Ayyildiz A, Kesimci I, Bolsoy Deveci S, Tutuncu M, Kizilkilic O, Telci L, Zengin R, Dincer A, Akinci IO, Kocer N. Brain MRI Findings in Patients in the Intensive Care Unit with COVID-19 Infection. <i>Radiology</i> 2020;297(1):E232-E235. doi: 10.1148/radiol.2020201697 | 137 | 150 |
| 97  | Brunese L, Mercaldo F, Reginelli A, Santone A. Explainable Deep Learning for Pulmonary Disease and Coronavirus COVID-19 Detection from X-rays. <i>Comput Methods Programs Biomed</i> 2020;196:105608. doi: 10.1016/j.cmpb.2020.105608                                                                                                                                                                                                                                                                                                                                                                                                                                                         | 136 | 1   |
| 98  | Pereira RM, Bertolini D, Teixeira LO, Silla CN, Jr., Costa YMG. COVID-19 identification in chest X-ray images on flat and hierarchical classification scenarios. <i>Comput Methods Programs Biomed</i> 2020;194:105532. doi: 10.1016/j.cmpb.2020.105532                                                                                                                                                                                                                                                                                                                                                                                                                                       | 135 | 1   |
| 99† | Han X, Fan Y, Alwalid O, Li N, Jia X, Yuan M, Li Y, Cao Y, Gu J, Wu H, Shi H. Six-month Follow-up Chest CT Findings after Severe COVID-19 Pneumonia. <i>Radiology</i> 2021;299(1):E177-E186. doi: 10.1148/radiol.2021203153.                                                                                                                                                                                                                                                                                                                                                                                                                                                                  | 133 | 504 |
| 100 | Liu KC, Xu P, Lv WF, Qiu XH, Yao JL, Gu JF, Wei W. CT manifestations of coronavirus disease-2019: A retrospective analysis of 73 cases by disease severity. <i>Eur J Radiol</i> 2020;126:108941. doi: 10.1016/j.ejrad.2020.108941                                                                                                                                                                                                                                                                                                                                                                                                                                                             | 132 | 50  |

\* Articles have the same rank because they have an equal number of citations.

† Thirty overlapping articles.

**Supplementary Table E2. The top 100 most-mentioned COVID-19-related radiological articles ranked in order of the Altmetric Attention Scores**

| Ranking        | Article                                                                                                                                                                                                                                                                                                                                              | Altmetric Attention Score | Number of citations |
|----------------|------------------------------------------------------------------------------------------------------------------------------------------------------------------------------------------------------------------------------------------------------------------------------------------------------------------------------------------------------|---------------------------|---------------------|
| 1 <sup>†</sup> | Puntmann VO, Carerj ML, Wieters I, Fahim M, Arendt C, Hoffmann J, Shchendrygina A, Escher F, Vasa-Nicotera M, Zeiher AM, Vehreschild M, Nagel E. Outcomes of Cardiovascular Magnetic Resonance Imaging in Patients Recently Recovered From Coronavirus Disease 2019 (COVID-19). JAMA Cardiol 2020;5(11):1265-1273. doi: 10.1001/jamacardio.2020.3557 | 13889                     | 760                 |
| 2              | Schauer J, Buddhe S, Gulhane A, Sagiv E, Studer M, Colyer J, Chikkabyrappa SM, Law Y, Portman MA. Persistent Cardiac Magnetic Resonance Imaging Findings in a Cohort of Adolescents with Post-Coronavirus Disease 2019 mRNA Vaccine Myopericarditis. J Pediatr 2022. doi: 10.1016/j.jpeds.2022.03.032                                                | 7783                      | N/A                 |
| 3 <sup>†</sup> | Rajpal S, Tong MS, Borchers J, Zareba KM, Obarski TP, Simonetti OP, Daniels CJ. Cardiovascular Magnetic Resonance Findings in Competitive Athletes Recovering From COVID-19 Infection. JAMA Cardiol 2021;6(1):116-118. doi: 10.1001/jamacardio.2020.4916                                                                                             | 3908                      | 200                 |
| 4              | Inui S, Fujikawa A, Jitsu M, Kunishima N, Watanabe S, Suzuki Y, Umeda S, Uwabe Y. Chest CT Findings in Cases from the Cruise Ship Diamond Princess with Coronavirus Disease (COVID-19). Radiol Cardiothorac Imaging 2020;2(2):e200110. doi: 10.1148/ryct.2020200110                                                                                  | 3035                      | N/A                 |
| 5 <sup>†</sup> | Ai T, Yang Z, Hou H, Zhan C, Chen C, Lv W, Tao Q, Sun Z, Xia L. Correlation of Chest CT and RT-PCR Testing for Coronavirus Disease 2019 (COVID-19) in China: A Report of 1014 Cases. Radiology                                                                                                                                                       | 2773                      | 2762                |

|                 |                                                                                                                                                                                                                                                                                                              |      |      |
|-----------------|--------------------------------------------------------------------------------------------------------------------------------------------------------------------------------------------------------------------------------------------------------------------------------------------------------------|------|------|
|                 | 2020;296(2):E32-E40. doi: 10.1148/radiol.2020200642                                                                                                                                                                                                                                                          |      |      |
| 6               | Morand A, Champion JY, Lepine A, Bosdure E, Luciani L, Cammilleri S, Chabrol B, Guedj E. Similar patterns of [(18)F]-FDG brain PET hypometabolism in paediatric and adult patients with long COVID: a paediatric case series. Eur J Nucl Med Mol Imaging 2022;49(3):913-920. doi: 10.1007/s00259-021-05528-4 | 2564 | 10   |
| 7 <sup>†</sup>  | Poyiadji N, Shahin G, Noujaim D, Stone M, Patel S, Griffith B. COVID-19-associated Acute Hemorrhagic Necrotizing Encephalopathy: Imaging Features. Radiology 2020;296(2):E119-E120. doi: 10.1148/radiol.2020201187                                                                                           | 2373 | 840  |
| 8 <sup>†</sup>  | Fang Y, Zhang H, Xie J, Lin M, Ying L, Pang P, Ji W. Sensitivity of Chest CT for COVID-19: Comparison to RT-PCR. Radiology 2020;296(2):E115-E117. doi: 10.1148/radiol.2020200432                                                                                                                             | 1948 | 1487 |
| 9               | Lindan CE, Mankad K, Ram D, Kocielek LK, Silvera VM, Boddaert N, Stivaros SM, Palasis S, Group APC. Neuroimaging manifestations in children with SARS-CoV-2 infection: a multinational, multicentre collaborative study. Lancet Child Adolesc Health 2021;5(3):167-177. doi: 10.1016/S2352-4642(20)30362-X   | 1837 | 58   |
| 10 <sup>†</sup> | Politi LS, Salsano E, Grimaldi M. Magnetic Resonance Imaging Alteration of the Brain in a Patient With Coronavirus Disease 2019 (COVID-19) and Anosmia. JAMA Neurol 2020;77(8):1028-1029. doi: 10.1001/jamaneurol.2020.2125                                                                                  | 1409 | 186  |

|    |                                                                                                                                                                                                                                                                                                                                                                                                                                                                                                                                                                                                                                                                                                                                                                                                           |      |     |
|----|-----------------------------------------------------------------------------------------------------------------------------------------------------------------------------------------------------------------------------------------------------------------------------------------------------------------------------------------------------------------------------------------------------------------------------------------------------------------------------------------------------------------------------------------------------------------------------------------------------------------------------------------------------------------------------------------------------------------------------------------------------------------------------------------------------------|------|-----|
| 11 | Meng H, Xiong R, He R, Lin W, Hao B, Zhang L, Lu Z, Shen X, Fan T, Jiang W, Yang W, Li T, Chen J, Geng Q. CT imaging and clinical course of asymptomatic cases with COVID-19 pneumonia at admission in Wuhan, China. J Infect 2020;81(1):e33-e39. doi: 10.1016/j.jinf.2020.04.004                                                                                                                                                                                                                                                                                                                                                                                                                                                                                                                         | 1311 | 129 |
| 12 | Chelala L, Jeudy J, Hossain R, Rosenthal G, Pietris N, White CS. Cardiac MRI Findings of Myocarditis After COVID-19 mRNA Vaccination in Adolescents. AJR Am J Roentgenol 2022;218(4):651-657. doi: 10.2214/AJR.21.26853                                                                                                                                                                                                                                                                                                                                                                                                                                                                                                                                                                                   | 1294 | 3   |
| 13 | Roberts M, Driggs D, Thorpe M, Gilbey J, Yeung M, Ursprung S, Aviles-Rivero AI, Etmann C, McCague C, Beer L, Weir-McCall JR, Teng Z, Gkrania-Klotsas E, Ruggiero A, Korhonen A, Jefferson E, Ako E, Langs G, Gozaliasl G, Yang G, Prosch H, Preller J, Stanczuk J, Tang J, Hofmanninger J, Babar J, Sánchez LE, Thillai M, Gonzalez PM, Teare P, Zhu X, Patel M, Cafolla C, Azadbakht H, Jacob J, Lowe J, Zhang K, Bradley K, Wasson M, Holzer M, Ji K, Ortet MD, Ai T, Walton N, Lio P, Stranks S, Shadbahr T, Lin W, Zha Y, Niu Z, Rudd JHF, Sala E, Schönlieb C-B, Aix C. Common pitfalls and recommendations for using machine learning to detect and prognosticate for COVID-19 using chest radiographs and CT scans. Nature Machine Intelligence 2021;3(3):199-217. doi: 10.1038/s42256-021-00307-0 | 1143 | 127 |
| 14 | Meyer-Szary J, Bazgier M, Lubocka P, Dorniak K, Sabiniewicz R. Cardiac magnetic resonance characteristics of acute myocarditis occurring after mRNA-based COVID-19 vaccines immunization. Cardiol J 2022;29(1):160-162. doi: 10.5603/CJ.a2021.0152                                                                                                                                                                                                                                                                                                                                                                                                                                                                                                                                                        | 1139 | N/A |

|                 |                                                                                                                                                                                                                                                                                                                                                                                                                                                                                                                                                                                                                                         |      |      |
|-----------------|-----------------------------------------------------------------------------------------------------------------------------------------------------------------------------------------------------------------------------------------------------------------------------------------------------------------------------------------------------------------------------------------------------------------------------------------------------------------------------------------------------------------------------------------------------------------------------------------------------------------------------------------|------|------|
| 15 <sup>†</sup> | Shi H, Han X, Jiang N, Cao Y, Alwalid O, Gu J, Fan Y, Zheng C. Radiological findings from 81 patients with COVID-19 pneumonia in Wuhan, China: a descriptive study. <i>Lancet Infect Dis</i> 2020;20(4):425-434. doi: 10.1016/S1473-3099(20)30086-4                                                                                                                                                                                                                                                                                                                                                                                     | 1064 | 1729 |
| 16 <sup>†</sup> | Bernheim A, Mei X, Huang M, Yang Y, Fayad ZA, Zhang N, Diao K, Lin B, Zhu X, Li K, Li S, Shan H, Jacobi A, Chung M. Chest CT Findings in Coronavirus Disease-19 (COVID-19): Relationship to Duration of Infection. <i>Radiology</i> 2020;295(3):200463. doi: 10.1148/radiol.2020200463                                                                                                                                                                                                                                                                                                                                                  | 977  | 195  |
| 17              | Kotecha T, Knight DS, Razvi Y, Kumar K, Vimallesvaran K, Thornton G, Patel R, Chacko L, Brown JT, Coyle C, Leith D, Shetye A, Ariff B, Bell R, Captur G, Coleman M, Goldring J, Gopalan D, Heightman M, Hillman T, Howard L, Jacobs M, Jeetley PS, Kanagaratnam P, Kon OM, Lamb LE, Manisty CH, Mathurdas P, Mayet J, Negus R, Patel N, Pierce I, Russell G, Wolff A, Xue H, Kellman P, Moon JC, Treibel TA, Cole GD, Fontana M. Patterns of myocardial injury in recovered troponin-positive COVID-19 patients assessed by cardiovascular magnetic resonance. <i>Eur Heart J</i> 2021;42(19):1866-1878. doi: 10.1093/eurheartj/ehab075 | 877  | 88   |
| 18              | Correa DG, Canete LAQ, Dos Santos GAC, de Oliveira RV, Brandao CO, da Cruz LCH, Jr. Neurological symptoms and neuroimaging alterations related with COVID-19 vaccine: Cause or coincidence? <i>Clin Imaging</i> 2021;80:348-352. doi: 10.1016/j.clinimag.2021.08.021                                                                                                                                                                                                                                                                                                                                                                    | 836  | 4    |
| 19              | Lecler A, Cotton F, Lersy F, Kremer S, Heran F, Group SFsCS. Ocular MRI Findings in Patients with Severe COVID-19: A Retrospective Multicenter Observational Study. <i>Radiology</i> 2021;299(2):E226-E229. doi:                                                                                                                                                                                                                                                                                                                                                                                                                        | 824  | 11   |



|                 |                                                                                                                                                                                                                                                                                      |     |      |
|-----------------|--------------------------------------------------------------------------------------------------------------------------------------------------------------------------------------------------------------------------------------------------------------------------------------|-----|------|
|                 | 10.1148/radiol.2021204394                                                                                                                                                                                                                                                            |     |      |
| 20 <sup>†</sup> | Xie X, Zhong Z, Zhao W, Zheng C, Wang F, Liu J. Chest CT for Typical Coronavirus Disease 2019 (COVID-19) Pneumonia: Relationship to Negative RT-PCR Testing. Radiology 2020;296(2):E41-E45. doi: 10.1148/radiol.2020200343                                                           | 786 | 1090 |
| 21              | Gollub RL. Brain changes after COVID revealed by imaging. Nature 2022;604(7907):633-634. doi: 10.1038/d41586-022-00503-x                                                                                                                                                             | 760 | N/A  |
| 22 <sup>†</sup> | Hosseiny M, Kooraki S, Gholamrezanezhad A, Reddy S, Myers L. Radiology Perspective of Coronavirus Disease 2019 (COVID-19): Lessons From Severe Acute Respiratory Syndrome and Middle East Respiratory Syndrome. AJR Am J Roentgenol 2020;214(5):1078-1082. doi: 10.2214/AJR.20.22969 | 754 | 219  |
| 23 <sup>†</sup> | Huang L, Zhao P, Tang D, Zhu T, Han R, Zhan C, Liu W, Zeng H, Tao Q, Xia L. Cardiac Involvement in Patients Recovered From COVID-2019 Identified Using Magnetic Resonance Imaging. JACC Cardiovasc Imaging 2020;13(11):2330-2339. doi: 10.1016/j.jcmg.2020.05.004                    | 733 | 207  |
| 24              | Aviram G, Viskin D, Topilsky Y, Sadon S, Shalmon T, Taieb P, Ghantous E, Flint N, Banai S, Havakuk O. Myocarditis Associated With COVID-19 Booster Vaccination. Circ Cardiovasc Imaging 2022;15(2):e013771. doi: 10.1161/CIRCIMAGING.121.013771                                      | 719 | N/A  |
| 25              | Patrignani A, Schicchi N, Calcagnoli F, Falchetti E, Ciampani N, Argalia G, Mariani A. Acute myocarditis                                                                                                                                                                             | 705 | N/A  |

|                 |                                                                                                                                                                                                                                                                                                                                                                                                                    |     |     |
|-----------------|--------------------------------------------------------------------------------------------------------------------------------------------------------------------------------------------------------------------------------------------------------------------------------------------------------------------------------------------------------------------------------------------------------------------|-----|-----|
|                 | following Comirnaty vaccination in a healthy man with previous SARS-CoV-2 infection. Radiol Case Rep 2021;16(11):3321-3325. doi: 10.1016/j.radcr.2021.07.082                                                                                                                                                                                                                                                       |     |     |
| 26 <sup>†</sup> | Smith MJ, Hayward SA, Innes SM, Miller ASC. Point-of-care lung ultrasound in patients with COVID-19 - a narrative review. Anaesthesia 2020;75(8):1096-1104. doi: 10.1111/anae.15082                                                                                                                                                                                                                                | 701 | 155 |
| 27              | Starekova J, Bluemke DA, Bradham WS, Grist TM, Schiebler ML, Reeder SB. Myocarditis Associated with mRNA COVID-19 Vaccination. Radiology 2021;301(2):E409-E411. doi: 10.1148/radiol.2021211430                                                                                                                                                                                                                     | 686 | 8   |
| 28 <sup>†</sup> | Oudkerk M, Buller HR, Kuijpers D, van Es N, Oudkerk SF, McLoud T, Gommers D, van Dissel J, Ten Cate H, van Beek EJR. Diagnosis, Prevention, and Treatment of Thromboembolic Complications in COVID-19: Report of the National Institute for Public Health of the Netherlands. Radiology 2020;297(1):E216-E222. doi: 10.1148/radiol.2020201629                                                                      | 680 | 165 |
| 29              | Ramani SL, Samet J, Franz CK, Hsieh C, Nguyen CV, Horbinski C, Deshmukh S. Musculoskeletal involvement of COVID-19: review of imaging. Skeletal Radiol 2021;50(9):1763-1773. doi: 10.1007/s00256-021-03734-7                                                                                                                                                                                                       | 624 | 27  |
| 30 <sup>†</sup> | Kremer S, Lersy F, de Seze J, Ferre JC, Maamar A, Carsin-Nicol B, Collange O, Bonneville F, Adam G, Martin-Blondel G, Rafiq M, Geeraerts T, Delamarre L, Grand S, Krainik A, Caillard S, Constans JM, Metanbou S, Heintz A, Helms J, Schenck M, Lefebvre N, Boutet C, Fabre X, Forestier G, de Beaurepaire I, Bornet G, Lacalm A, Oesterle H, Bolognini F, Messie J, Hmeydia G, Benzakoun J, Oppenheim C, Bapst B, | 595 | 183 |

|    |                                                                                                                                                                                                                                                                                                                                                                                                                                                                                                                                                                                                                                                                                     |     |     |
|----|-------------------------------------------------------------------------------------------------------------------------------------------------------------------------------------------------------------------------------------------------------------------------------------------------------------------------------------------------------------------------------------------------------------------------------------------------------------------------------------------------------------------------------------------------------------------------------------------------------------------------------------------------------------------------------------|-----|-----|
|    | Megdiche I, Henry Feugeas MC, Khalil A, Gaudemer A, Jager L, Nesser P, Talla Mba Y, Hemmert C, Feuerstein P, Sebag N, Carre S, Alleg M, Lecocq C, Schmitt E, Anxionnat R, Zhu F, Comby PO, Ricolfi F, Thouant P, Desal H, Boulouis G, Berge J, Kazemi A, Pyatigorskaya N, Lecler A, Saleme S, Edjlali-Goujon M, Kerleroux B, Zorn PE, Matthieu M, Baloglu S, Ardellier FD, Willaume T, Brisset JC, Boulay C, Mutschler V, Hansmann Y, Mertes PM, Schneider F, Fafi-Kremer S, Ohana M, Meziani F, David JS, Meyer N, Anheim M, Cotton F. Brain MRI Findings in Severe COVID-19: A Retrospective Observational Study. Radiology 2020;297(2):E242-E251. doi: 10.1148/radiol.2020202222 |     |     |
| 31 | Bhayana R, Som A, Li MD, Carey DE, Anderson MA, Blake MA, Catalano O, Gee MS, Hahn PF, Harisinghani M, Kilcoyne A, Lee SI, Mojtahed A, Pandharipande PV, Pierce TT, Rosman DA, Saini S, Samir AE, Simeone JF, Gervais DA, Velmahos G, Misdraji J, Kambadakone A. Abdominal Imaging Findings in COVID-19: Preliminary Observations. Radiology 2020;297(1):E207-E215. doi: 10.1148/radiol.2020201908                                                                                                                                                                                                                                                                                  | 582 | 117 |
| 32 | Viskin D, Topilsky Y, Aviram G, Mann T, Sadon S, Hadad Y, Flint N, Shmilovich H, Banai S, Havakuk O. Myocarditis Associated With COVID-19 Vaccination: Echocardiography, Cardiac Tomography, and Magnetic Resonance Imaging Findings. Circ Cardiovasc Imaging 2021;14(9):e013236. doi: 10.1161/CIRCIMAGING.121.013236                                                                                                                                                                                                                                                                                                                                                               | 566 | 5   |
| 33 | Lehman CD, Lamb LR, D'Alessandro HA. Mitigating the Impact of Coronavirus Disease (COVID-19) Vaccinations on Patients Undergoing Breast Imaging Examinations: A Pragmatic Approach. AJR Am J Roentgenol 2021;217(3):584-586. doi: 10.2214/AJR.21.25688                                                                                                                                                                                                                                                                                                                                                                                                                              | 552 | 22  |

|                 |                                                                                                                                                                                                                                                                                                                                                                                                                                                                                                                                                  |     |     |
|-----------------|--------------------------------------------------------------------------------------------------------------------------------------------------------------------------------------------------------------------------------------------------------------------------------------------------------------------------------------------------------------------------------------------------------------------------------------------------------------------------------------------------------------------------------------------------|-----|-----|
| 34              | Lui K, Wilson MP, Low G. Abdominal imaging findings in patients with SARS-CoV-2 infection: a scoping review. <i>Abdom Radiol (NY)</i> 2021;46(3):1249-1255. doi: 10.1007/s00261-020-02739-5                                                                                                                                                                                                                                                                                                                                                      | 546 | 24  |
| 35 <sup>†</sup> | Rubin GD, Ryerson CJ, Haramati LB, Sverzellati N, Kanne JP, Raoof S, Schluger NW, Volpi A, Yim JJ, Martin IBK, Anderson DJ, Kong C, Altes T, Bush A, Desai SR, Goldin O, Goo JM, Humbert M, Inoue Y, Kauczor HU, Luo F, Mazzone PJ, Prokop M, Remy-Jardin M, Richeldi L, Schaefer-Prokop CM, Tomiyama N, Wells AU, Leung AN. The Role of Chest Imaging in Patient Management during the COVID-19 Pandemic: A Multinational Consensus Statement from the Fleischner Society. <i>Radiology</i> 2020;296(1):172-180. doi: 10.1148/radiol.2020201365 | 535 | 544 |
| 36              | Isaak A, Feisst A, Luetkens JA. Myocarditis Following COVID-19 Vaccination. <i>Radiology</i> 2021;301(1):E378-E379. doi: 10.1148/radiol.2021211766                                                                                                                                                                                                                                                                                                                                                                                               | 530 | 3   |
| 37              | Patel YR, Louis DW, Atalay M, Agarwal S, Shah NR. Cardiovascular magnetic resonance findings in young adult patients with acute myocarditis following mRNA COVID-19 vaccination: a case series. <i>J Cardiovasc Magn Reson</i> 2021;23(1):101. doi: 10.1186/s12968-021-00795-4                                                                                                                                                                                                                                                                   | 528 | 8   |
| 38              | Adin ME, Isufi E, Kulon M, Pucar D. Association of COVID-19 mRNA Vaccine With Ipsilateral Axillary Lymph Node Reactivity on Imaging. <i>JAMA Oncol</i> 2021;7(8):1241-1242. doi: 10.1001/jamaoncol.2021.1794                                                                                                                                                                                                                                                                                                                                     | 526 | 9   |
| 39 <sup>†</sup> | Lei J, Li J, Li X, Qi X. CT Imaging of the 2019 Novel Coronavirus (2019-nCoV) Pneumonia. <i>Radiology</i> 2020;295(1):18. doi: 10.1148/radiol.2020200236                                                                                                                                                                                                                                                                                                                                                                                         | 520 | 295 |

|                 |                                                                                                                                                                                                                                                                                                                                  |     |     |
|-----------------|----------------------------------------------------------------------------------------------------------------------------------------------------------------------------------------------------------------------------------------------------------------------------------------------------------------------------------|-----|-----|
| 40              | Mansour J, Short RG, Bhalla S, Woodard PK, Verma A, Robinson X, Raptis DA. Acute myocarditis after a second dose of the mRNA COVID-19 vaccine: a report of two cases. Clin Imaging 2021;78:247-249. doi: 10.1016/j.clinimag.2021.06.019                                                                                          | 507 | 18  |
| 41 <sup>†</sup> | Han X, Fan Y, Alwalid O, Li N, Jia X, Yuan M, Li Y, Cao Y, Gu J, Wu H, Shi H. Six-month Follow-up Chest CT Findings after Severe COVID-19 Pneumonia. Radiology 2021;299(1):E177-E186. doi: 10.1148/radiol.2021203153                                                                                                             | 504 | 133 |
| 42              | Kim H, Hong H, Yoon SH. Diagnostic Performance of CT and Reverse Transcriptase Polymerase Chain Reaction for Coronavirus Disease 2019: A Meta-Analysis. Radiology 2020;296(3):E145-E155. doi: 10.1148/radiol.2020201343                                                                                                          | 483 | 61  |
| 43              | Badrawi N, Kumar N, Albastaki U. Post COVID-19 vaccination neuromyelitis optica spectrum disorder: Case report & MRI findings. Radiol Case Rep 2021;16(12):3864-3867. doi: 10.1016/j.radcr.2021.09.033                                                                                                                           | 475 | N/A |
| 44 <sup>†</sup> | Leonard-Lorant I, Delabranche X, Severac F, Helms J, Pauzet C, Collange O, Schneider F, Labani A, Bilbault P, Moliere S, Leyendecker P, Roy C, Ohana M. Acute Pulmonary Embolism in Patients with COVID-19 at CT Angiography and Relationship to d-Dimer Levels. Radiology 2020;296(3):E189-E191. doi: 10.1148/radiol.2020201561 | 460 | 266 |
| 45 <sup>†</sup> | Grillet F, Behr J, Calame P, Aubry S, Delabrousse E. Acute Pulmonary Embolism Associated with COVID-                                                                                                                                                                                                                             | 454 | 241 |

|    |                                                                                                                                                                                                                                                                                                                 |     |     |
|----|-----------------------------------------------------------------------------------------------------------------------------------------------------------------------------------------------------------------------------------------------------------------------------------------------------------------|-----|-----|
|    | 19 Pneumonia Detected with Pulmonary CT Angiography. Radiology 2020;296(3):E186-E188. doi: 10.1148/radiol.2020201544                                                                                                                                                                                            |     |     |
| 46 | Grist JT, Chen M, Collier GJ, Raman B, Abueid G, McIntyre A, Matthews V, Fraser E, Ho LP, Wild JM, Gleeson F. Hyperpolarized (129)Xe MRI Abnormalities in Dyspneic Patients 3 Months after COVID-19 Pneumonia: Preliminary Results. Radiology 2021;301(1):E353-E360. doi: 10.1148/radiol.2021210033             | 452 | 13  |
| 47 | Moonis G, Filippi CG, Kirsch CFE, Mohan S, Stein EG, Hirsch JA, Mahajan A. The Spectrum of Neuroimaging Findings on CT and MRI in Adults With COVID-19. AJR Am J Roentgenol 2021;217(4):959-974. doi: 10.2214/AJR.20.24839                                                                                      | 448 | 18  |
| 48 | Guedj E, Campion JY, Dudouet P, Kaphan E, Bregeon F, Tissot-Dupont H, Guis S, Barthelemy F, Habert P, Ceccaldi M, Million M, Raoult D, Cammilleri S, Eldin C. (18)F-FDG brain PET hypometabolism in patients with long COVID. Eur J Nucl Med Mol Imaging 2021;48(9):2823-2833. doi: 10.1007/s00259-021-05215-4  | 438 | 56  |
| 49 | Keshavarz P, Yazdanpanah F, Rafiee F, Mizandari M. Lymphadenopathy Following COVID-19 Vaccination: Imaging Findings Review. Acad Radiol 2021;28(8):1058-1071. doi: 10.1016/j.acra.2021.04.007                                                                                                                   | 426 | 16  |
| 50 | Simpson S, Kay FU, Abbara S, Bhalla S, Chung JH, Chung M, Henry TS, Kanne JP, Kligerman S, Ko JP, Litt H. Radiological Society of North America Expert Consensus Document on Reporting Chest CT Findings Related to COVID-19: Endorsed by the Society of Thoracic Radiology, the American College of Radiology, | 425 | N/A |

|     |                                                                                                                                                                                                                                                                                                |     |     |
|-----|------------------------------------------------------------------------------------------------------------------------------------------------------------------------------------------------------------------------------------------------------------------------------------------------|-----|-----|
|     | and RSNA. Radiol Cardiothorac Imaging 2020;2(2):e200152. doi: 10.1148/ryct.2020200152                                                                                                                                                                                                          |     |     |
| 51  | Xie Y, Wang X, Yang P, Zhang S. COVID-19 Complicated by Acute Pulmonary Embolism. Radiol Cardiothorac Imaging 2020;2(2):e200067. doi: 10.1148/ryct.2020200067                                                                                                                                  | 408 | N/A |
| 52* | Shiyovich A, Witberg G, Aviv Y, Eisen A, Orvin K, Wiessman M, Grinberg T, Porter A, Kornowski R, Hamdan A. Myocarditis following COVID-19 vaccination: magnetic resonance imaging study. Eur Heart J Cardiovasc Imaging 2021. doi: 10.1093/ehjci/jeab230                                       | 396 | N/A |
| 52* | Chen L, Huang X, Yi Z, Deng Q, Jiang N, Feng C, Zhou Q, Sun B, Chen W, Guo R. Ultrasound Imaging Findings of Acute Testicular Infection in Patients With Coronavirus Disease 2019: A Single-Center-Based Study in Wuhan, China. J Ultrasound Med 2021;40(9):1787-1794. doi: 10.1002/jum.15558  | 396 | 17  |
| 54† | Poggiali E, Dacrema A, Bastoni D, Tinelli V, Demichele E, Mateo Ramos P, Marciano T, Silva M, Vercelli A, Magnacavallo A. Can Lung US Help Critical Care Clinicians in the Early Diagnosis of Novel Coronavirus (COVID-19) Pneumonia? Radiology 2020;295(3):E6. doi: 10.1148/radiol.2020200847 | 389 | 165 |
| 55  | Shaw KE, Cavalcante JL, Han BK, Goss I M. Possible Association Between COVID-19 Vaccine and Myocarditis: Clinical and CMR Findings. JACC Cardiovasc Imaging 2021;14(9):1856-1861. doi: 10.1016/j.jcmg.2021.06.002                                                                              | 386 | 11  |
| 56  | Suh YJ, Hong H, Ohana M, Bompard F, Revel MP, Valle C, Gervaise A, Poissy J, Susen S, Hekimian G,                                                                                                                                                                                              | 385 | 54  |

|                 |                                                                                                                                                                                                                                                                                    |     |     |
|-----------------|------------------------------------------------------------------------------------------------------------------------------------------------------------------------------------------------------------------------------------------------------------------------------------|-----|-----|
|                 | Artifoni M, Periard D, Contou D, Delaloye J, Sanchez B, Fang C, Garzillo G, Robbie H, Yoon SH. Pulmonary Embolism and Deep Vein Thrombosis in COVID-19: A Systematic Review and Meta-Analysis. Radiology 2021;298(2):E70-E80. doi: 10.1148/radiol.2020203557                       |     |     |
| 57              | DeGrave AJ, Janizek JD, Lee S-I. AI for radiographic COVID-19 detection selects shortcuts over signal. Nature Machine Intelligence 2021;3(7):610-619. doi: 10.1038/s42256-021-00338-7                                                                                              | 380 | 23  |
| 58              | Cho JL, Villacreses R, Nagpal P, Guo J, Pezzulo AA, Thurman AL, Hamzeh NY, Blount RJ, Fortis S, Hoffman EA, Zabner J, Comellas AP. Quantitative Chest CT Assessment of Small Airways Disease in Post-Acute SARS-CoV-2 Infection. Radiology 2022;212170. doi: 10.1148/radiol.212170 | 374 | N/A |
| 59              | Goldman IA, Ye K, Scheinfeld MH. Lower-extremity Arterial Thrombosis Associated with COVID-19 Is Characterized by Greater Thrombus Burden and Increased Rate of Amputation and Death. Radiology 2020;297(2):E263-E269. doi: 10.1148/radiol.2020202348                              | 369 | 35  |
| 60              | Duszak R, Jr., Maze J, Sessa C, Fleishon HB, Golding LP, Nicola GN, Hughes DR. Characteristics of COVID-19 Community Practice Declines in Noninvasive Diagnostic Imaging Professional Work. J Am Coll Radiol 2020;17(11):1453-1459. doi: 10.1016/j.jacr.2020.06.031                | 368 | 10  |
| 61 <sup>†</sup> | Chung M, Bernheim A, Mei X, Zhang N, Huang M, Zeng X, Cui J, Xu W, Yang Y, Fayad ZA, Jacobi A, Li K, Li S, Shan H. CT Imaging Features of 2019 Novel Coronavirus (2019-nCoV). Radiology 2020;295(1):202-207. doi: 10.1148/radiol.2020200230                                        | 364 | 233 |



|     |                                                                                                                                                                                                                                                                                                                                                                                                                                                                                                                                                                                                                                                                                                             |     |     |
|-----|-------------------------------------------------------------------------------------------------------------------------------------------------------------------------------------------------------------------------------------------------------------------------------------------------------------------------------------------------------------------------------------------------------------------------------------------------------------------------------------------------------------------------------------------------------------------------------------------------------------------------------------------------------------------------------------------------------------|-----|-----|
| 62  | Starekova J, Bluemke DA, Bradham WS, Eckhardt LL, Grist TM, Kusmirek JE, Purtell CS, Schiebler ML, Reeder SB. Evaluation for Myocarditis in Competitive Student Athletes Recovering From Coronavirus Disease 2019 With Cardiac Magnetic Resonance Imaging. JAMA Cardiol 2021;6(8):945-950. doi: 10.1001/jamacardio.2020.7444                                                                                                                                                                                                                                                                                                                                                                                | 362 | 70  |
| 63  | Volpicelli G, Gargani L, Perlini S, Spinelli S, Barbieri G, Lanotte A, Casasola GG, Nogue-Bou R, Lamorte A, Agricola E, Villen T, Deol PS, Nazerian P, Corradi F, Stefanone V, Fraga DN, Navalesi P, Ferre R, Boero E, Martinelli G, Cristoni L, Perani C, Vetrugno L, McDermott C, Miralles-Aguiar F, Secco G, Zattera C, Salinaro F, Grignaschi A, Boccattonda A, Giostra F, Infante MN, Covella M, Ingallina G, Burkert J, Frumento P, Forfori F, Ghiadoni L, on behalf of the International Multicenter Study Group on LUSiC. Lung ultrasound for the early diagnosis of COVID-19 pneumonia: an international multicenter study. Intensive Care Med 2021;47(4):444-454. doi: 10.1007/s00134-021-06373-7 | 357 | 38  |
| 64  | Esenwa C, Lee JA, Nisar T, Shmukler A, Goldman I, Zampolin R, Hsu K, Labovitz D, Altschul D, Haramati LB. Utility of Apical Lung Assessment on Computed Tomography Angiography as a COVID-19 Screen in Acute Stroke. Stroke 2020;51(12):3765-3769. doi: 10.1161/STROKEAHA.120.030959                                                                                                                                                                                                                                                                                                                                                                                                                        | 356 | 1   |
| 65† | Xu YH, Dong JH, An WM, Lv XY, Yin XP, Zhang JZ, Dong L, Ma X, Zhang HJ, Gao BL. Clinical and computed tomographic imaging features of novel coronavirus pneumonia caused by SARS-CoV-2. J Infect 2020;80(4):394-400. doi: 10.1016/j.jinf.2020.02.017                                                                                                                                                                                                                                                                                                                                                                                                                                                        | 352 | 290 |

|     |                                                                                                                                                                                                                                                                                                                                                                           |     |     |
|-----|---------------------------------------------------------------------------------------------------------------------------------------------------------------------------------------------------------------------------------------------------------------------------------------------------------------------------------------------------------------------------|-----|-----|
| 66  | Boursier C, Chevalier E, Filippetti L, Imbert L, Roch V, Huttin O, Claudin M, Marie PY. (68)Ga-DOTATOC digital-PET imaging of inflammatory cell infiltrates in myocarditis following COVID-19 vaccination. Eur J Nucl Med Mol Imaging 2022;49(4):1433-1434. doi: 10.1007/s00259-021-05609-4                                                                               | 346 | 2   |
| 67  | Wehbe RM, Sheng J, Dutta S, Chai S, Dravid A, Barutcu S, Wu Y, Cantrell DR, Xiao N, Allen BD, MacNealy GA, Savas H, Agrawal R, Parekh N, Katsaggelos AK. DeepCOVID-XR: An Artificial Intelligence Algorithm to Detect COVID-19 on Chest Radiographs Trained and Tested on a Large U.S. Clinical Data Set. Radiology 2021;299(1):E167-E176. doi: 10.1148/radiol.2020203511 | 340 | 37  |
| 68† | Lee EYP, Ng MY, Khong PL. COVID-19 pneumonia: what has CT taught us? Lancet Infect Dis 2020;20(4):384-385. doi: 10.1016/S1473-3099(20)30134-1                                                                                                                                                                                                                             | 339 | 155 |
| 69  | Liu P, Tan XZ. 2019 Novel Coronavirus (2019-nCoV) Pneumonia. Radiology 2020;295(1):19. doi: 10.1148/radiol.2020200257                                                                                                                                                                                                                                                     | 335 | 36  |
| 70* | Okolo GI, Katsigiannis S, Althobaiti T, Ramzan N. On the Use of Deep Learning for Imaging-Based COVID-19 Detection Using Chest X-rays. Sensors (Basel) 2021;21(17). doi: 10.3390/s21175702                                                                                                                                                                                | 321 | N/A |
| 70* | Amornsiripanitch N, Chikarmane SA, Bay CP, Giess CS. Patients characteristics related to screening mammography cancellation and rescheduling rates during the COVID-19 pandemic. Clin Imaging 2021;80:205-210. doi: 10.1016/j.clinimag.2021.07.009                                                                                                                        | 321 | 4   |

|                 |                                                                                                                                                                                                                                                                                                                                                                    |     |     |
|-----------------|--------------------------------------------------------------------------------------------------------------------------------------------------------------------------------------------------------------------------------------------------------------------------------------------------------------------------------------------------------------------|-----|-----|
| 72              | Agarwal S, Conway J, Nguyen V, Dogra S, Krieger P, Zagzag D, Lewis A, Melmed K, Galetta S, Jain R. Serial Imaging of Virus-Associated Necrotizing Disseminated Acute Leukoencephalopathy (VANDAL) in COVID-19. AJNR Am J Neuroradiol 2021;42(2):279-284. doi: 10.3174/ajnr.A6898                                                                                   | 319 | 7   |
| 73              | Luger AK, Sonnweber T, Gruber L, Schwabl C, Cima K, Tymoszek P, Gerstner AK, Pizzini A, Sahanic S, Boehm A, Coen M, Strolz CJ, Woll E, Weiss G, Kirchmair R, Feuchtner GM, Prosch H, Tancevski I, Löffler-Ragg J, Widmann G. Chest CT of Lung Injury 1 Year after COVID-19 Pneumonia: The CovILD Study. Radiology 2022;211670. doi: 10.1148/radiol.211670          | 317 | N/A |
| 74              | Hope MD, Raptis CA, Shah A, Hammer MM, Henry TS, six s. A role for CT in COVID-19? What data really tell us so far. Lancet 2020;395(10231):1189-1190. doi: 10.1016/S0140-6736(20)30728-5                                                                                                                                                                           | 315 | 110 |
| 75 <sup>†</sup> | Li Y, Xia L. Coronavirus Disease 2019 (COVID-19): Role of Chest CT in Diagnosis and Management. AJR Am J Roentgenol 2020;214(6):1280-1286. doi: 10.2214/AJR.20.22954                                                                                                                                                                                               | 307 | 525 |
| 75 <sup>*</sup> | Schachner ER, Spieler B. Three-dimensional (3D) lung segmentation for diagnosis of COVID-19 and the communication of disease impact to the public. BMJ Case Rep 2020;13(8). doi: 10.1136/bcr-2020-236943                                                                                                                                                           | 307 | N/A |
| 77 <sup>†</sup> | Soldati G, Smargiassi A, Inchingolo R, Buonsenso D, Perrone T, Briganti DF, Perlini S, Torri E, Mariani A, Mossolani EE, Tursi F, Mento F, Demi L. Proposal for International Standardization of the Use of Lung Ultrasound for Patients With COVID-19: A Simple, Quantitative, Reproducible Method. J Ultrasound Med 2020;39(7):1413-1419. doi: 10.1002/jum.15285 | 306 | 253 |

|                 |                                                                                                                                                                                                                                                                                                      |     |      |
|-----------------|------------------------------------------------------------------------------------------------------------------------------------------------------------------------------------------------------------------------------------------------------------------------------------------------------|-----|------|
| 78 <sup>†</sup> | Xia W, Shao J, Guo Y, Peng X, Li Z, Hu D. Clinical and CT features in pediatric patients with COVID-19 infection: Different points from adults. <i>Pediatr Pulmonol</i> 2020;55(5):1169-1174. doi: 10.1002/ppul.24718                                                                                | 295 | 537  |
| 78 <sup>*</sup> | Hameed S, Elbaaly H, Reid CEL, Santos RMF, Shivamurthy V, Wong J, Jogeessvaran KH. Spectrum of Imaging Findings at Chest Radiography, US, CT, and MRI in Multisystem Inflammatory Syndrome in Children Associated with COVID-19. <i>Radiology</i> 2021;298(1):E1-E10. doi: 10.1148/radiol.2020202543 | 295 | 60   |
| 80 <sup>†</sup> | Pan F, Ye T, Sun P, Gui S, Liang B, Li L, Zheng D, Wang J, Hesketh RL, Yang L, Zheng C. Time Course of Lung Changes at Chest CT during Recovery from Coronavirus Disease 2019 (COVID-19). <i>Radiology</i> 2020;295(3):715-721. doi: 10.1148/radiol.2020200370                                       | 294 | 1127 |
| 81 <sup>†</sup> | Mossa-Basha M, Meltzer CC, Kim DC, Tuite MJ, Kolli KP, Tan BS. Radiology Department Preparedness for COVID-19: Radiology Scientific Expert Review Panel. <i>Radiology</i> 2020;296(2):E106-E112. doi: 10.1148/radiol.2020200988                                                                      | 293 | 143  |
| 82              | Hossain R, Lazarus MS, Roudenko A, Dako F, Mehta V, Alis J, Zalta B, Lei B, Haramati LB, White CS. CT Scans Obtained for Nonpulmonary Indications: Associated Respiratory Findings of COVID-19. <i>Radiology</i> 2020;296(3):E173-E179. doi: 10.1148/radiol.2020201743                               | 275 | 19   |
| 83              | Song H, Bergman A, Chen AT, Ellis D, David G, Friedman AB, Bond AM, Bailey JM, Brooks R, Smith-McLallen A. Disruptions in preventive care: Mammograms during the COVID-19 pandemic. <i>Health Serv Res</i> 2021;56(1):95-101. doi: 10.1111/1475-6773.13596                                           | 271 | 22   |

|                 |                                                                                                                                                                                                                                                                          |     |     |
|-----------------|--------------------------------------------------------------------------------------------------------------------------------------------------------------------------------------------------------------------------------------------------------------------------|-----|-----|
| 84              | Mehta N, Sales RM, Babagbemi K, Levy AD, McGrath AL, Drotman M, Dodelzon K. Unilateral axillary Adenopathy in the setting of COVID-19 vaccine. Clin Imaging 2021;75:12-15. doi: 10.1016/j.clinimag.2021.01.016                                                           | 270 | 46  |
| 85              | Kim IC, Kim H, Lee HJ, Kim JY, Kim JY. Cardiac Imaging of Acute Myocarditis Following COVID-19 mRNA Vaccination. J Korean Med Sci 2021;36(32):e229. doi: 10.3346/jkms.2021.36.e229                                                                                       | 268 | 7   |
| 86              | Freer PE. The Impact of the COVID-19 Pandemic on Breast Imaging. Radiol Clin North Am 2021;59(1):1-11. doi: 10.1016/j.rcl.2020.09.008                                                                                                                                    | 266 | 24  |
| 87              | Kelsch RD, Silbergleit R, Krishnan A. Neuroimaging in the First 6 Weeks of the COVID-19 Pandemic in an 8-Hospital Campus: Observations and Patterns in the Brain, Head and Neck, and Spine. J Comput Assist Tomogr 2021;45(4):592-599. doi: 10.1097/RCT.0000000000001179 | 261 | N/A |
| 88              | Lochner P, Fousse M, Goi Junior JR, Mathur S, Merzou F. Rare cerebral vein thrombosis and COVID-19 vaccine: the role of orbit ultrasound. Neurol Sci 2022;43(5):2957-2959. doi: 10.1007/s10072-021-05839-2                                                               | 260 | 1   |
| 89*             | Chang MC, Lee W, Hur J, Park D. Chest Computed Tomography Findings in Asymptomatic Patients with COVID-19. Respiration 2020;99(9):748-754. doi: 10.1159/000509334                                                                                                        | 255 | 14  |
| 89 <sup>†</sup> | Li L, Qin L, Xu Z, Yin Y, Wang X, Kong B, Bai J, Lu Y, Fang Z, Song Q, Cao K, Liu D, Wang G, Xu Q, Fang X, Zhang S, Xia J, Xia J. Using Artificial Intelligence to Detect COVID-19 and Community-acquired                                                                | 255 | 483 |

|     |                                                                                                                                                                                                                                                                                                            |     |     |
|-----|------------------------------------------------------------------------------------------------------------------------------------------------------------------------------------------------------------------------------------------------------------------------------------------------------------|-----|-----|
|     | Pneumonia Based on Pulmonary CT: Evaluation of the Diagnostic Accuracy. Radiology 2020;296(2):E65-E71. doi: 10.1148/radiol.2020200905                                                                                                                                                                      |     |     |
| 91  | Honarmand AR, Mackey J, Hayeri R. Shoulder injury related to vaccine administration (SIRVA) following mRNA COVID-19 vaccination: Report of 2 cases of subacromial-subdeltoid bursitis. Radiol Case Rep 2021;16(12):3631-3634. doi: 10.1016/j.radcr.2021.08.019                                             | 254 | N/A |
| 92  | Yamaura H, Ishikawa H, Otsuka K, Kasayuki N. Reverse Takotsubo Cardiomyopathy as a Cause of Acute Chest Pain in a Young Woman Following COVID-19 Vaccination. Circ Cardiovasc Imaging 2022;15(1):e013661. doi: 10.1161/CIRCIMAGING.121.013661                                                              | 251 | N/A |
| 93  | Dangis A, Gieraerts C, De Bruecker Y, Janssen L, Valgaeren H, Obbels D, Gillis M, Van Ranst M, Frans J, Demeyere A, Symons R. Accuracy and Reproducibility of Low-Dose Submillisievert Chest CT for the Diagnosis of COVID-19. Radiol Cardiothorac Imaging 2020;2(2):e200196. doi: 10.1148/ryct.2020200196 | 247 | N/A |
| 94  | Lee JE, Hwang M, Kim YH, Chung M, Sim B, Chae KJ, Yoo JY, Jeong YJ. Imaging and Clinical Features of COVID-19 Breakthrough Infections: A Multicenter Study. Radiology 2022;213072. doi: 10.1148/radiol.213072                                                                                              | 242 | N/A |
| 95  | COVID-Net: A Tailored Deep Convolutional Neural Network Design for Detection of COVID-19 Cases from Chest Radiography Images                                                                                                                                                                               | 235 | N/A |
| 96* | Phelan D, Kim JH, Elliott MD, Wasfy MM, Cremer P, Johri AM, Emery MS, Sengupta PP, Sharma S, Martinez                                                                                                                                                                                                      | 234 | 50  |

|                 |                                                                                                                                                                                                                                                                                                                                                                                         |     |     |
|-----------------|-----------------------------------------------------------------------------------------------------------------------------------------------------------------------------------------------------------------------------------------------------------------------------------------------------------------------------------------------------------------------------------------|-----|-----|
|                 | MW, La Gerche A. Screening of Potential Cardiac Involvement in Competitive Athletes Recovering From COVID-19: An Expert Consensus Statement. JACC Cardiovasc Imaging 2020;13(12):2635-2652. doi: 10.1016/j.jcmg.2020.10.005                                                                                                                                                             |     |     |
| 96 <sup>†</sup> | Lang M, Som A, Mendoza DP, Flores EJ, Reid N, Carey D, Li MD, Witkin A, Rodriguez-Lopez JM, Shepard JO, Little BP. Hypoxaemia related to COVID-19: vascular and perfusion abnormalities on dual-energy CT. Lancet Infect Dis 2020;20(12):1365-1366. doi: 10.1016/S1473-3099(20)30367-4                                                                                                  | 234 | 151 |
| 98              | Hope MD, Raptis CA, Henry TS. Chest Computed Tomography for Detection of Coronavirus Disease 2019 (COVID-19): Don't Rush the Science. Ann Intern Med 2020;173(2):147-148. doi: 10.7326/M20-1382                                                                                                                                                                                         | 229 | 33  |
| 99              | Albareello F, Pianura E, Di Stefano F, Cristofaro M, Petrone A, Marchioni L, Palazzolo C, Schinina V, Nicastrì E, Petrosillo N, Campioni P, Eskild P, Zumla A, Ippolito G, Group CIS. 2019-novel Coronavirus severe adult respiratory distress syndrome in two cases in Italy: An uncommon radiological presentation. Int J Infect Dis 2020;93:192-197. doi: 10.1016/j.ijid.2020.02.043 | 224 | 97  |
| 100             | Ohata EF, Bezerra GM, Chagas JVSd, Neto AVL, Albuquerque AB, Albuquerque VHCd, Filho PPR. Automatic detection of COVID-19 infection using chest X-ray images through transfer learning. IEEE/CAA Journal of Automatica Sinica 2021;8(1):239-248. doi: 10.1109/JAS.2020.1003393                                                                                                          | 216 | 34  |

\*Articles have the same rank because they have an equal Altmetric Attention Score.

† Thirty overlapping articles.

N/A = not applicable because the article was published in a journal that is not indexed on the Web of Science.
